# Supplementary material for: Use of Yarrowia lipolytica Lipase Immobilized in Cell Debris for the Production of Lipolyzed Milk Fat (LMF)
Source: MDPI journal article supplement (doi:10.3390/ijms19113413), 2018-10-31
Supplement: s1 [file s1]

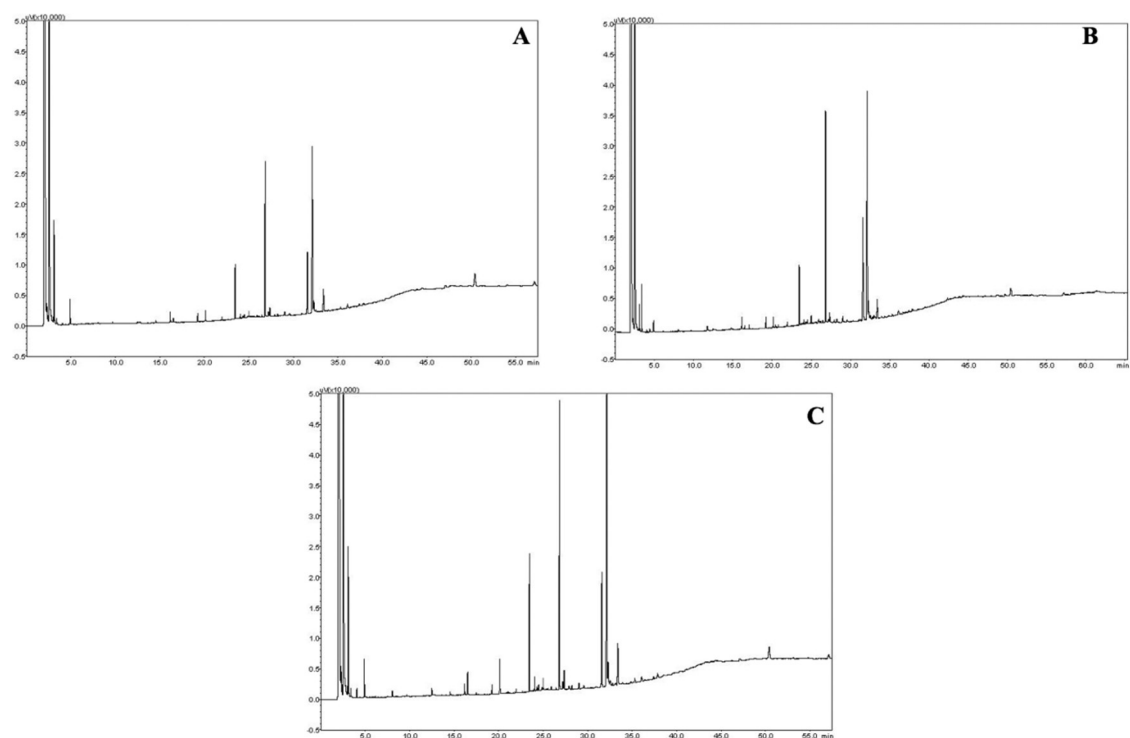

**Figure S2.** Representative chromatograms for the analysis of fatty acid methyl esters by gas chromatography (GC). The fatty acid profile is from the free fatty acids fraction after milk fat lipolysis by *Yarrowia lipolytica* lipase immobilized with cell debris (LipImDebri). The free fatty acids fraction was isolated by thin layer chromatography on silica-gel plates and the bands corresponding to FFA was scraped-off before methylation. **A:** hydrolyzed milk fat by 500 mg of LipImDebri for 4.5 h; **B:** hydrolyzed milk fat by 500 mg of LipImDebri for 6 h; **C:** hydrolyzed milk fat by 750 mg of LipImDebri for 3 h.
