# Supplementary material for: Use of Yarrowia lipolytica Lipase Immobilized in Cell Debris for the Production of Lipolyzed Milk Fat (LMF)
Source: MDPI journal article supplement (doi:10.3390/ijms19113413), 2018-10-31
Supplement: s1 [file s1]

**Table S1.** High performance liquid chromatography (HPLC) solvent gradient and gas chromatography (GC) temperature gradient, used for analysis of lipid classes, and fatty acid methyl esters, respectively.

| Time (min) | HPLC solvents gradient (%)   |               |
|------------|------------------------------|---------------|
|            | Acetonitrile                 | Isopropanol   |
| 0          | 100                          | 0             |
| 60         | 31                           | 69            |
| 61         | 100                          | 0             |
| 76         | 100                          | 0             |
| Time (min) | GC temperature gradient (°C) |               |
|            | Column oven (°C)             | Rate (°C/min) |
| 0 to 3     | 40                           | -             |
| 3 to 25    | gradient                     | 6.5           |
| 25 to 28   | 180                          |               |
| 28 to 43   | gradient                     | 2.0           |
| 43 to 58   | 210                          |               |
