# Supplementary material for: Use of Yarrowia lipolytica Lipase Immobilized in Cell Debris for the Production of Lipolyzed Milk Fat (LMF)
Source: MDPI journal article supplement (doi:10.3390/ijms19113413), 2018-10-31
Supplement: s1 [file s1]

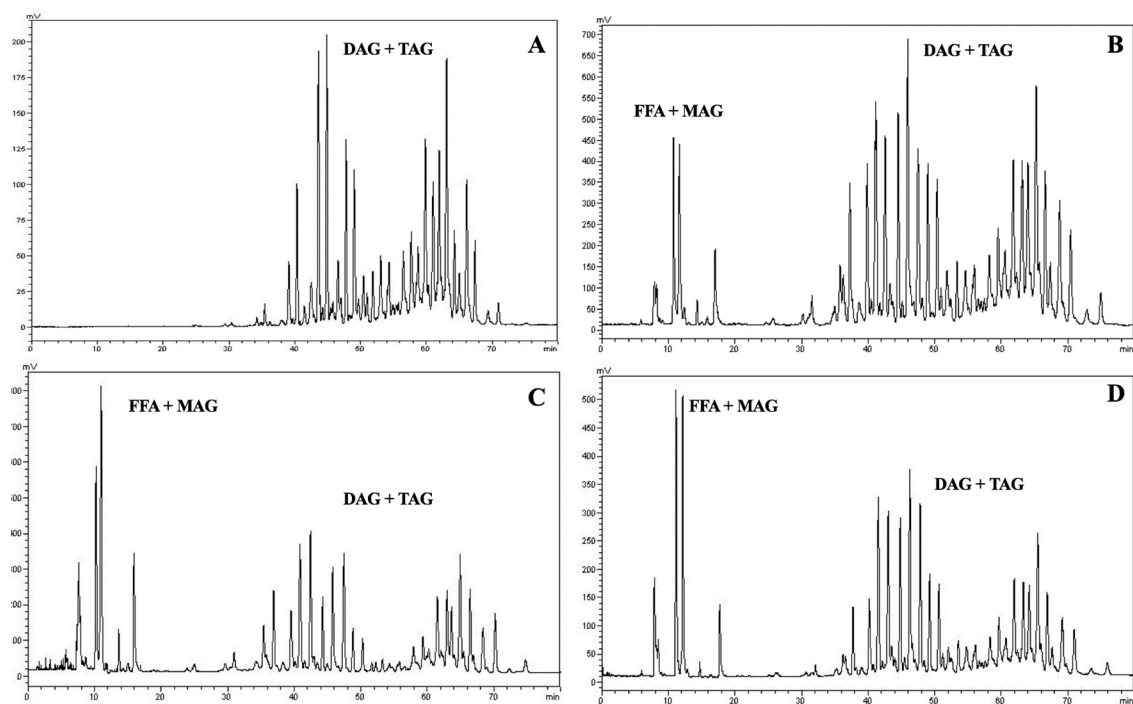

**Figure S1.** Representative chromatograms of lipid classes analysis by reversed-phase high performance liquid chromatography (HPLC) showing lipolysis of milk fat by *Yarrowia lipolytica* lipase immobilized on cell debris (LipImDebri). FFA + MAG, free fatty acids + monoacylglycerol classes; DAG + TAG, diacylglycerol + triacylglycerol classes. **A:** non-hydrolyzed milk fat; **B:** hydrolyzed milk fat by 500 mg of LipImDebri for 4.5 h; **C:** hydrolyzed milk fat by 500 mg of LipImDebri for 6 h; **D:** hydrolyzed milk fat by 750 mg of LipImDebri for 3 h.
